# Supplementary material
Source: PubMed Central journal article supplement (PMC5821522)
Supplement: NIHMS925166-supplement-supplement_1.pdf [file NIHMS925166-supplement-supplement_1.pdf]

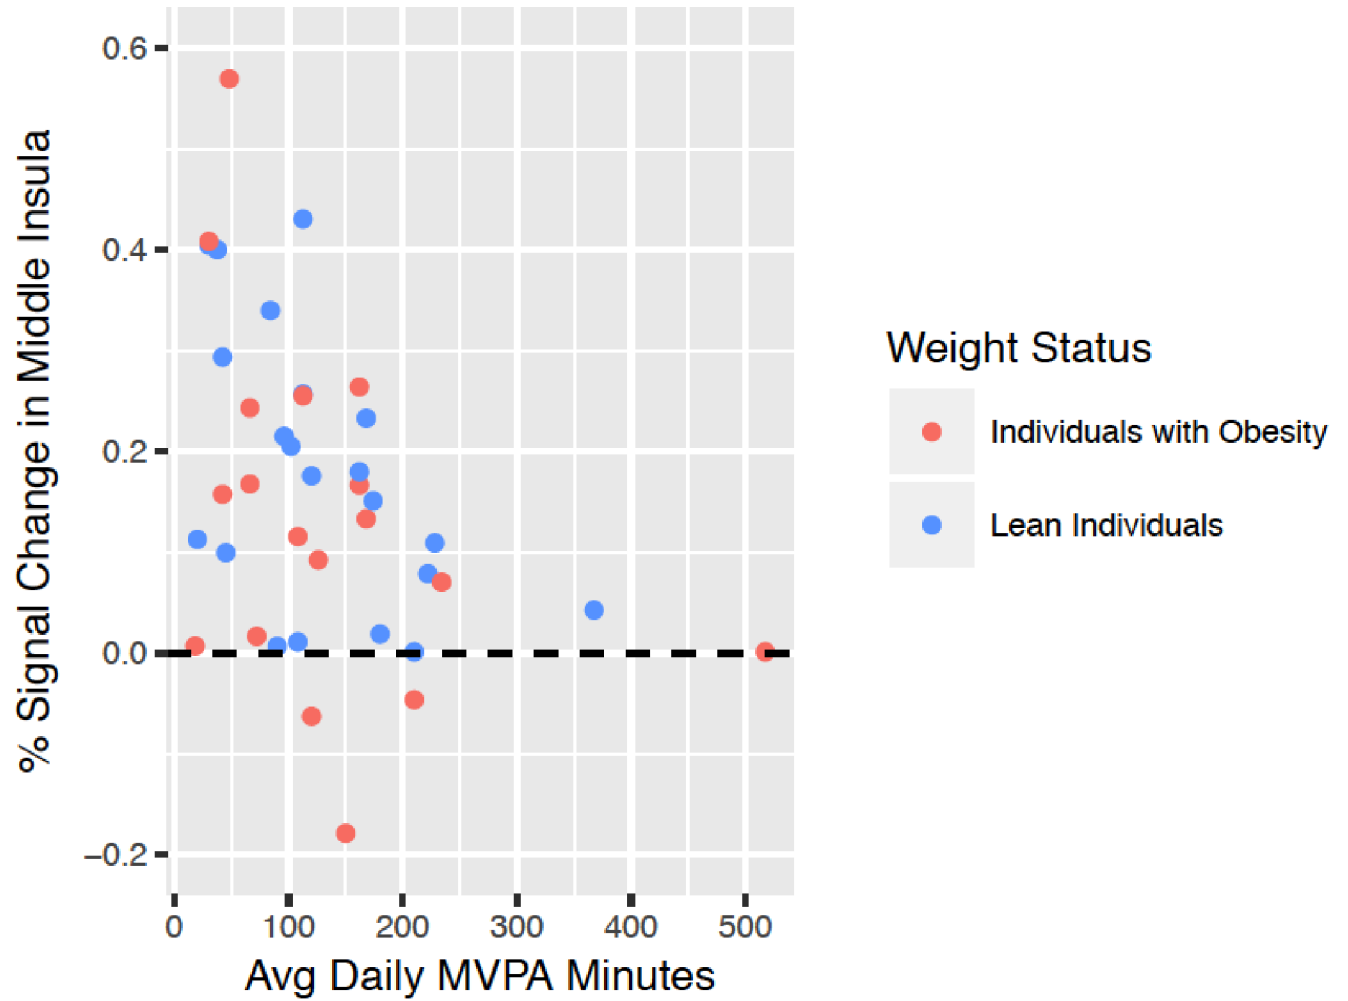

**Figure S1.** Correlation of average daily minutes spent in moderate-to-vigorous physical activity (MVPA) with brain response to food vs. non-food cues in the middle insula. Blue indicates lean individuals and red indicates individuals with obesity.

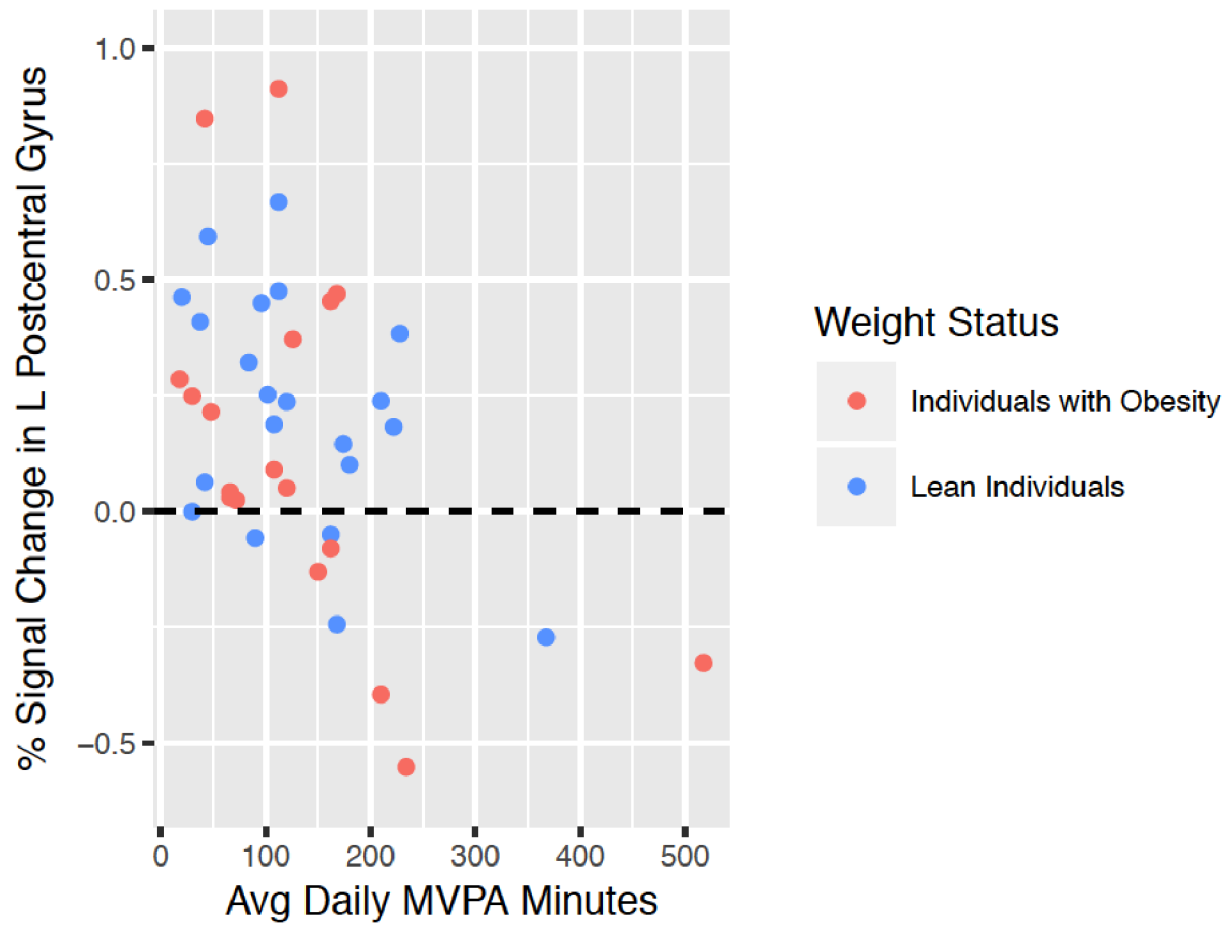

**Figure S2.** Correlation of average daily minutes spent in moderate-to-vigorous physical activity (MVPA) with brain response to food vs. non-food cues in the left postcentral gyrus. Blue indicates lean individuals and red indicates individuals with obesity.

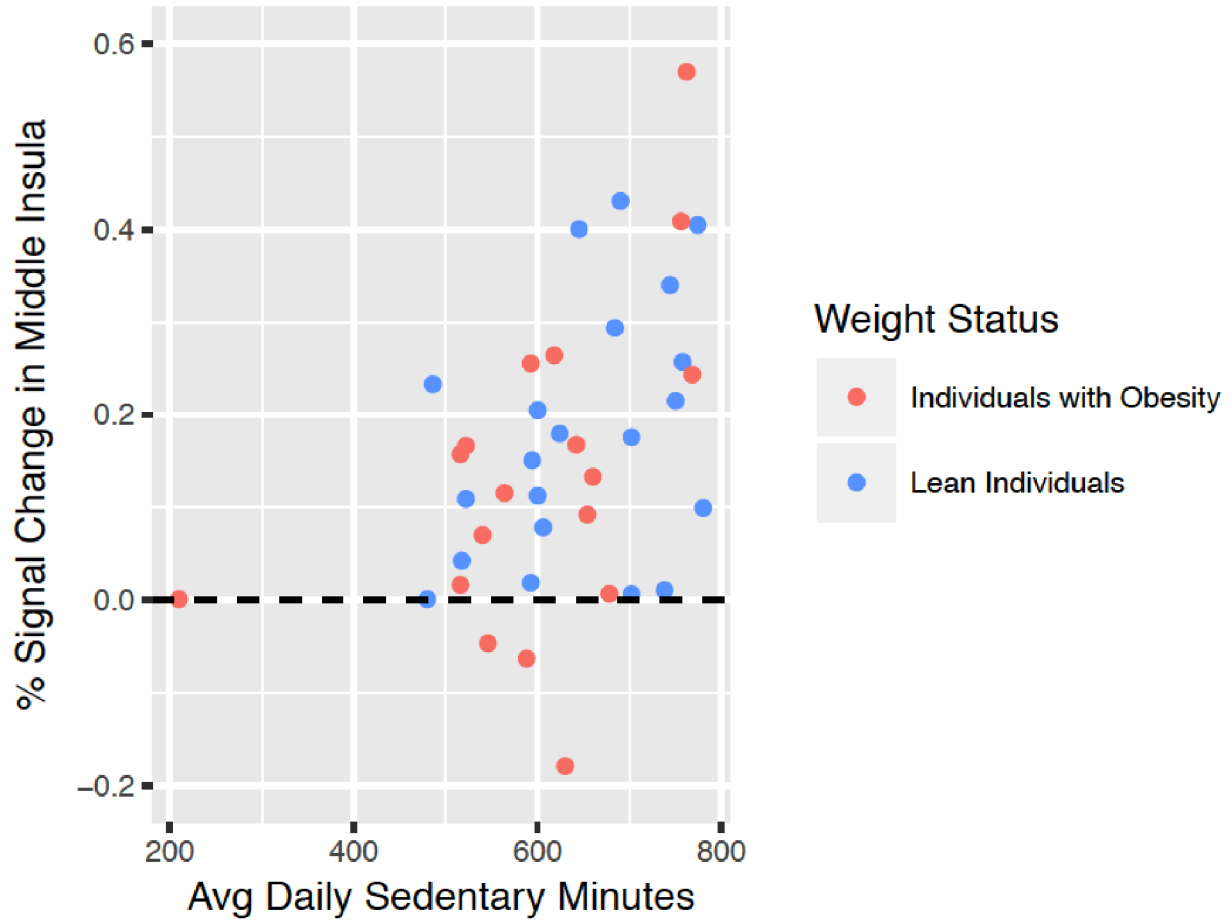

**Figure S3.** Correlation of average daily minutes spent in sedentary behavior with brain response to food vs. non-food cues in the middle insula. Blue indicates lean individuals and red indicates individuals with obesity.
